# Supplementary material for: Exploring Industry-Distress Effects on Loan Recovery: A Double Machine Learning Approach for Quantiles
Source: MDPI journal article supplement (doi:10.3390/econometrics11010006), 2023-02-14
Supplement: s1 [file s1]

## S1: Recovery rate by industry

Table S1: Summary statistics of recovery rate by industry

| quantile      | 10%   | 25%   | 50%    | 75%    | 90%    | avg.  | obs.  |
|---------------|-------|-------|--------|--------|--------|-------|-------|
| recovery rate | 1.93  | 20.61 | 65.41  | 100.00 | 100.00 | 59.41 | 5,334 |
| AUTOS         | 1.38  | 40.36 | 81.48  | 100.00 | 100.00 | 65.59 | 186   |
| BEER          | 25.86 | 47.94 | 67.83  | 93.29  | 100.00 | 64.56 | 6     |
| BOOKS         | 2.51  | 23.74 | 45.31  | 97.00  | 100.00 | 54.47 | 156   |
| BUSEQ         | 6.10  | 18.38 | 64.57  | 100.00 | 100.00 | 58.51 | 184   |
| CARRY         | 2.63  | 17.65 | 61.17  | 100.00 | 100.00 | 52.73 | 19    |
| CHEMS         | 6.86  | 33.57 | 100.00 | 100.00 | 100.00 | 68.27 | 118   |
| CLTHS         | 18.62 | 29.69 | 63.85  | 100.00 | 100.00 | 64.95 | 56    |
| CNSTR         | 1.43  | 31.14 | 61.04  | 100.00 | 100.00 | 59.76 | 237   |
| COAL          | 4.12  | 28.68 | 49.07  | 100.00 | 100.00 | 57.60 | 39    |
| ELCEQ         | 16.52 | 19.04 | 75.81  | 100.00 | 100.00 | 63.43 | 40    |
| FABPR         | 5.21  | 43.52 | 74.80  | 100.00 | 100.00 | 67.04 | 117   |
| FIN           | 0.70  | 6.75  | 49.68  | 100.00 | 100.00 | 52.41 | 113   |
| FOOD          | 17.67 | 48.20 | 96.34  | 100.00 | 100.00 | 75.14 | 97    |
| GAMES         | 3.74  | 17.56 | 74.15  | 100.00 | 100.00 | 59.88 | 169   |
| HLTH          | 1.62  | 13.51 | 52.31  | 100.00 | 100.00 | 54.41 | 189   |
| HSHLD         | 1.85  | 21.81 | 74.15  | 100.00 | 100.00 | 60.64 | 112   |
| MEALS         | 1.15  | 25.27 | 72.88  | 100.00 | 100.00 | 62.92 | 186   |
| MINES         | 16.57 | 27.20 | 31.99  | 88.52  | 100.00 | 50.41 | 29    |
| OIL           | 5.41  | 22.65 | 54.35  | 100.00 | 100.00 | 56.60 | 390   |
| OTHER         | 2.76  | 12.61 | 67.72  | 100.00 | 100.00 | 58.19 | 104   |
| PAPER         | 2.03  | 38.06 | 100.00 | 100.00 | 100.00 | 71.26 | 151   |
| RTAIL         | 0.73  | 14.78 | 48.46  | 100.00 | 100.00 | 53.31 | 538   |
| SERVS         | 1.27  | 15.93 | 75.34  | 100.00 | 100.00 | 60.68 | 307   |
| STEEL         | 0.00  | 8.99  | 55.27  | 100.00 | 100.00 | 54.90 | 139   |
| TELCM         | 0.43  | 10.21 | 50.03  | 100.00 | 100.00 | 51.03 | 746   |
| TRANS         | 4.40  | 20.62 | 56.22  | 100.00 | 100.00 | 56.18 | 384   |
| TXTLS         | 15.99 | 38.62 | 68.05  | 100.00 | 100.00 | 64.46 | 81    |
| UTIL          | 40.58 | 83.90 | 100.00 | 100.00 | 100.00 | 85.58 | 309   |
| WHLSL         | 0.09  | 10.23 | 48.67  | 100.00 | 100.00 | 51.75 | 132   |

## S2: Macroeconomics and industry-specific variables

Table S2: Macroeconomics and industry-specific variables

| Panel A: Macroeconomics variables |                 |                                                                                                       |
|-----------------------------------|-----------------|-------------------------------------------------------------------------------------------------------|
| 1                                 | A713RX1Q020SBEA | Final Sales to Domestic Purchasers                                                                    |
| 2                                 | AAA             | Moodys Seasoned Aaa Corporate Bond Yield                                                              |
| 3                                 | AAAFFM          | Moodys Seasoned Aaa Corporate Bond Minus Federal Funds Rate                                           |
| 4                                 | ALTSALES        | Light Weight Vehicle Sales: Autos & Light Trucks                                                      |
| 5                                 | AWHMAN          | Value of Manufacturers Unfilled Orders for Durable Goods Industries                                   |
| 6                                 | AWOTMAN         | Average Weekly Hours of Production and Nonsupervisory Employees: Manufacturing                        |
| 7                                 | BAA             | Moodys Seasoned Baa Corporate Bond Yield                                                              |
| 8                                 | BAA10Y          | Moodys Seasoned Baa Corporate Bond Yield Relative to Yield on 10-Year Treasury                        |
| 9                                 | BAAFFM          | Moodys Seasoned Baa Corporate Bond Minus Federal Funds Rate                                           |
| 10                                | BORROW          | Total Borrowings of Depository Institutions from the Federal Reserve                                  |
| 11                                | BUSLOANS        | Commercial and Industrial Loans, All Commercial Banks                                                 |
| 12                                | CBI             | Change in Private Inventories                                                                         |
| 13                                | CCSA            | Continued Claims (Insured Unemployment)                                                               |
| 14                                | CE16OV          | Civilian Employment                                                                                   |
| 15                                | CES0600000008   | Average Hourly Earnings of Production and Nonsupervisory Employees: Goods-Producing                   |
| 16                                | CES2000000008   | Average Hourly Earnings of Production and Nonsupervisory Employees: Construction                      |
| 17                                | CES3000000008   | Average Hourly Earnings of Production and Nonsupervisory Employees: Manufacturing                     |
| 18                                | CNCF            | Corporate Net Cash Flow with IVA                                                                      |
| 19                                | CP              | Corporate Profits After Tax (without IVA and CCAdj)                                                   |
| 20                                | CPATAX          | Corporate Profits After Tax (with IVA and CCAdj)                                                      |
| 21                                | CPIAPPSL        | Consumer Price Index for All Urban Consumers: Apparel                                                 |
| 22                                | CPIAUCSL        | Consumer Price Index for All Urban Consumers: All Items                                               |
| 23                                | CPIENGSL        | Consumer Price Index for All Urban Consumers: Energy                                                  |
| 24                                | CPIMEDSL        | Consumer Price Index for All Urban Consumers: Medical Care                                            |
| 25                                | CPITRNSL        | Consumer Price Index for All Urban Consumers: Transportation                                          |
| 26                                | CPIULFSL        | Consumer Price Index for All Urban Consumers: All Items Less Food                                     |
| 27                                | CQRMTSPL        | Real Manufacturing and Trade Industries SalesAdjusted                                                 |
| 28                                | CSCICP03USM665S | Consumer Opinion Surveys: Confidence Indicators:<br>Composite Indicators: OECD Indicator for the U.S. |
| 29                                | CUMFN           | Capacity Utilization: Manufacturing                                                                   |
| 30                                | CUSR0000SA0L2   | Consumer Price Index for All Urban Consumers: All items less shelter                                  |
| 31                                | CUSR0000SA0L5   | Consumer Price Index for All Urban Consumers: All items less medical care                             |
| 32                                | CUSR0000SAC     | Consumer Price Index for All Urban Consumers: Commodities                                             |
| 33                                | CUSR0000SAD     | Consumer Price Index for All Urban Consumers: Durables                                                |
| 34                                | CUSR0000SAS     | Consumer Price Index for All Urban Consumers: Services                                                |
| 35                                | DDURRD3Q086SBEA | Personal consumption expenditures: Durable goods (implicit price deflator)                            |
| 36                                | DIVIDEND        | Corporate Profits after tax with IVA and CCAdj: Net Dividends                                         |
| 37                                | DNDGRD3Q086SBEA | Personal consumption expenditures: Nondurable goods (implicit price deflator)                         |
| 38                                | DPCERD3Q086SBEA | Personal consumption expenditures (implicit price deflator)                                           |
| 39                                | DPIC96          | Real Disposable Personal Income                                                                       |
| 40                                | EMRATIO         | Civilian Employment-Population Ratio                                                                  |
| 41                                | EXCAUS          | Canada / U.S. Foreign Exchange Rate, Canadian Dollars to One U.S. Dollar                              |
| 42                                | EXCSRESNS       | Excess Reserves of Depository Institutions                                                            |
| 43                                | EXJPUS          | Japan / U.S. Foreign Exchange Rate, Japanese Yen to One U.S. Dollar                                   |
| 44                                | EXPGSC1         | Real Exports of Goods & Services                                                                      |
| 45                                | EXSZUS          | Switzerland / U.S. Foreign Exchange Rate, Swiss Francs to One U.S. Dollar                             |
| 46                                | EXUSUK          | U.S. / U.K. Foreign Exchange Rate, U.S. Dollars to One British Pound                                  |

(Continued on next page)

Table S2 – (Continued)

|    |                 |                                                                            |
|----|-----------------|----------------------------------------------------------------------------|
| 47 | FEDFUNDS        | Effective Federal Funds Rate                                               |
| 48 | FINSLC1         | Real Final Sales of Domestic Product                                       |
| 49 | FODSP           | Household Financial Obligations as a percent of Disposable Personal Income |
| 50 | GCE             | Government Consumption Expenditures & Gross Investment                     |
| 51 | GDPC1           | Real Gross Domestic Product                                                |
| 52 | GDPDEF          | Gross Domestic Product: Implicit Price Deflator                            |
| 53 | GFDEBTN         | Federal Debt: Total Public Debt                                            |
| 54 | GPDI            | Gross Private Domestic Investment                                          |
| 55 | GS1             | 1-Year Treasury Constant Maturity Rate                                     |
| 56 | GS10            | 10-Year Treasury Constant Maturity Rate                                    |
| 57 | GS5             | 5-Year Treasury Constant Maturity Rate                                     |
| 58 | GSAVE           | Gross Saving                                                               |
| 59 | HOUST           | Housing Starts: Total: New Privately Owned Housing Units Started           |
| 60 | HOUSTMW         | Housing Starts in Midwest Census Region                                    |
| 61 | HOUSTNE         | Housing Starts in Northeast Census Region                                  |
| 62 | HOUSTS          | Housing Starts in South Census Region                                      |
| 63 | HOUSTW          | Housing Starts in West Census Region                                       |
| 64 | HSN1F           | New One Family Houses Sold: United States                                  |
| 65 | ICSA            | Initial Unemployment Claims                                                |
| 66 | IMPGSC1         | Real imports of goods and services                                         |
| 67 | INDPRO          | Industrial Production Index                                                |
| 68 | INVCQRMTSPL     | Real Manufacturing and Trade Inventories                                   |
| 69 | IPB00004SQ      | Industrial Production: Manufacturing (SIC)                                 |
| 70 | IPB51000SQ      | Industrial Production: Consumer Goods                                      |
| 71 | IPB51100SQ      | Industrial Production: Durable Consumer Goods                              |
| 72 | IPB51200SQ      | Industrial Production: Nondurable Consumer Goods                           |
| 73 | IPB51221SQ      | Industrial Production: Fuels                                               |
| 74 | IPB53000SQ      | Industrial Production: Materials                                           |
| 75 | IPBUSEQ         | Industrial Production: Business Equipment                                  |
| 76 | IPDMAT          | Industrial Production: Durable Materials                                   |
| 77 | IPFINAL         | Industrial Production: Final Products (Market Group)                       |
| 78 | IPGMFSQ         | Industrial Production: Manufacturing (NAICS)                               |
| 79 | IPNMAT          | Industrial Production: Nondurable Materials                                |
| 80 | LOANS           | Loans and Leases in Bank Credit, All Commercial Banks                      |
| 81 | M1SL            | M1 Money Stock                                                             |
| 82 | M2SL            | M2 Money Stock                                                             |
| 83 | MABMM301USQ189S | M3 for the United States                                                   |
| 84 | MICH            | University of Michigan Inflation Expectation                               |
| 85 | MORTG           | 30-Year Conventional Mortgage Rate                                         |
| 86 | MPRIME          | Bank Prime Loan Rate                                                       |
| 87 | NASDAQ100       | NASDAQ 100 Index                                                           |
| 88 | PCDG            | Personal Consumption Expenditures: Durable Goods                           |
| 89 | PCECC96         | Real Personal Consumption Expenditures                                     |
| 90 | PERMIT          | New Private Housing Units Authorized by Building Permits                   |
| 91 | PERMITMW        | New Private Housing Units Authorized by Building Permits (Midwest)         |
| 92 | PERMITNE        | New Private Housing Units Authorized by Building Permits (Northeast)       |
| 93 | PERMITS         | New Private Housing Units Authorized by Building Permits (South)           |
| 94 | PERMITW         | New Private Housing Units Authorized by Building Permits (West)            |
| 95 | PINCOME         | Personal Income                                                            |
| 96 | PNFI            | Private Nonresidential Fixed Investment                                    |
| 97 | PPIACO          | Producer Price Index for All Commodities                                   |
| 98 | PPIIDC          | Producer Price Index by Commodity Industrial Commodities                   |
| 99 | PSAVE           | Personal Saving                                                            |

(Continued on next page)

Table S2 – (Continued)

|                                      |                 |                                                                                                                                   |
|--------------------------------------|-----------------|-----------------------------------------------------------------------------------------------------------------------------------|
| 100                                  | PSAVERT         | Personal Saving Rate                                                                                                              |
| 101                                  | REALLN          | Real Estate Loans, All Commercial Banks                                                                                           |
| 102                                  | RU2000PR        | Russell 2000 Price Index                                                                                                          |
| 103                                  | SP500 RETURN    | S&P500 Return                                                                                                                     |
| 104                                  | T10Y3MM         | 10-Year Treasury Minus 3-Month Treasury Rate                                                                                      |
| 105                                  | TB3MS           | 3-Month Treasury Bill: Secondary Market Rate                                                                                      |
| 106                                  | TB6MS           | 6-Month Treasury Bill: Secondary Market Rate                                                                                      |
| 107                                  | TCU             | Capacity Utilization: Total Industry                                                                                              |
| 108                                  | TDSP            | Household Debt Service Payments as a Percent of Disposable Personal Income                                                        |
| 109                                  | TEDRATE         | 3-month LIBOR Rate Based on US dollars Minus 3-month Treasury Bill Rate                                                           |
| 110                                  | TOTALSL         | Total Consumer Credit Owned and Securitized, Outstanding                                                                          |
| 111                                  | TOTBKCR         | Bank Credit of All Commercial Banks                                                                                               |
| 112                                  | TWEXBPA         | Real Trade Weighted U.S. Dollar Index: Broad                                                                                      |
| 113                                  | TWEXMMTH        | Trade Weighted U.S. Dollar Index: Major Currencies                                                                                |
| 114                                  | U1RATE          | Persons unemployed 15 weeks or longer, as a percent of the civilian labor force                                                   |
| 115                                  | UEMP15OV        | Number of Civilians Unemployed for 15 Weeks and Over                                                                              |
| 116                                  | UEMP15T26       | Number of Civilians Unemployed for 15 to 26 Weeks                                                                                 |
| 117                                  | UEMP27OV        | Number of Civilians Unemployed for 27 Weeks and Over                                                                              |
| 118                                  | UEMP5TO14       | Number of Civilians Unemployed for 5 to 14 Weeks                                                                                  |
| 119                                  | UEMPLT5         | Number of Civilians Unemployed for Less Than 5 Weeks                                                                              |
| 120                                  | UEMPMEAN        | Average (Mean) Duration of Unemployment                                                                                           |
| 121                                  | ULCNFB          | Nonfarm Business Sector: Unit Labor Cost                                                                                          |
| 122                                  | UMCSENT         | University of Michigan: Consumer Sentiment                                                                                        |
| 123                                  | UNRATE          | Civilian Unemployment Rate                                                                                                        |
| 124                                  | US13NP TL       | Nonperforming Loans (past due 90+ days plus nonaccrual) to Total Loans for U.S. Banks with average assets betw. USD 100M and 300M |
| 125                                  | USLLRTL         | Loan Loss Reserve to Total Loans for all U.S. Banks                                                                               |
| 126                                  | USLSTL          | Net Loan Losses to Average Total Loans for all U.S. Banks                                                                         |
| 127                                  | USROE           | Return on Average Equity for all U.S. Banks                                                                                       |
| 128                                  | USSTHPI         | All-Transactions House Price Index for the United States                                                                          |
| 129                                  | VIXCLS          | CBOE Volatility Index: VIX                                                                                                        |
| 130                                  | WPSFD49207      | Producer Price Index by Commodity for Final Demand: Finished Goods                                                                |
| Panel B: Industry-specific variables |                 |                                                                                                                                   |
| 1                                    | accrual         | Accruals/Average Assets                                                                                                           |
| 2                                    | adv_sale        | Advertising Expenses/Sales                                                                                                        |
| 3                                    | aftret_eq       | After-tax Return on Average Common Equity                                                                                         |
| 4                                    | aftret_equity   | After-tax Return on Total Stockholders Equity                                                                                     |
| 5                                    | aftret_invcapx  | After-tax Return on Invested Capital                                                                                              |
| 6                                    | at_turn         | Asset Turnover                                                                                                                    |
| 7                                    | bm              | Book/Market                                                                                                                       |
| 8                                    | CAPEI           | Shillers Cyclically Adjusted P/E Ratio                                                                                            |
| 9                                    | capital_ratio   | Capitalization Ratio                                                                                                              |
| 10                                   | cash_conversion | Cash Conversion Cycle (Days)                                                                                                      |
| 11                                   | cash_debt       | Cash Flow/Total Debt                                                                                                              |
| 12                                   | cash_lt         | Cash Balance/Total Liabilities                                                                                                    |
| 13                                   | cash_ratio      | Cash Ratio                                                                                                                        |
| 14                                   | cfm             | Cash Flow Margin                                                                                                                  |
| 15                                   | curr_debt       | Current Liabilities/Total Liabilities                                                                                             |
| 16                                   | curr_ratio      | Current Ratio                                                                                                                     |
| 17                                   | de_ratio        | Total Debt/Equity                                                                                                                 |
| 18                                   | debt_assets     | Total Debt/Total Assets                                                                                                           |
| 19                                   | debt_at         | Total Debt/Total Assets                                                                                                           |

(Continued on next page)

Table S2 – (Continued)

|    |                     |                                                         |
|----|---------------------|---------------------------------------------------------|
| 20 | debt_capital        | Total Debt/Capital                                      |
| 21 | debt_ebitda         | Total Debt/EBITDA                                       |
| 22 | debt_invcap         | Long-term Debt/Invested Capital                         |
| 23 | divyield            | Dividend Yield                                          |
| 24 | dltt_be             | Long-term Debt/Book Equity                              |
| 25 | dpr                 | Dividend Payout Ratio                                   |
| 26 | efftax              | Effective Tax Rate                                      |
| 27 | equity_invcap       | Common Equity/Invested Capital                          |
| 28 | evm                 | Enterprise Value Multiple                               |
| 29 | fcf_ocf             | Free Cash Flow/Operating Cash Flow                      |
| 30 | gpm                 | Gross Profit Margin                                     |
| 31 | GProf               | Gross Profit/Total Assets                               |
| 32 | indret_ew           | Equal Weighted Industry Return                          |
| 33 | indret_vw           | Value Weighted Industry Return                          |
| 34 | industry_return     | Past 12 Month Industry Return                           |
| 35 | industry_volatility | Past 12 Month Standard Deviation of the Industry Return |
| 36 | int_debt            | Interest/Average Long-term Debt                         |
| 37 | int_totdebt         | Interest/Average Total Debt                             |
| 38 | intcov              | After-tax Interest Coverage                             |
| 39 | intcov_ratio        | Interest Coverage Ratio                                 |
| 40 | inv_turn            | Inventory Turnover                                      |
| 41 | inv_t_act           | Inventory/Current Assets                                |
| 42 | lt_debt             | Long-term Debt/Total Liabilities                        |
| 43 | lt_ppent            | Total Liabilities/Total Tangible Assets                 |
| 44 | npm                 | Net Profit Margin                                       |
| 45 | ocf_lct             | Operating CF/Current Liabilities                        |
| 46 | opmad               | Operating Profit Margin After Depreciation              |
| 47 | opmbd               | Operating Profit Margin Before Depreciation             |
| 48 | pay_turn            | Payable Turnover                                        |
| 49 | pcf                 | Price/Cash flow                                         |
| 50 | pe_exi              | P/E (Diluted, Excl. EI)                                 |
| 51 | pe_inc              | P/E (Diluted, Incl. EI)                                 |
| 52 | PEG_1yrforward      | Forward P/E to 1-year Growth (PEG) ratio                |
| 53 | PEG_ltgforward      | Forward P/E to Long-term Growth (PEG) ratio             |
| 54 | pretret_earnat      | Pre-tax Return on Total Earning Assets                  |
| 55 | pretret_noa         | Pre-tax return on Net Operating Assets                  |
| 56 | profit_lct          | Profit Before Depreciation/Current Liabilities          |
| 57 | ps                  | Price/Sales                                             |
| 58 | ptb                 | Price/Book                                              |
| 59 | ptpm                | Pre-tax Profit Margin                                   |
| 60 | quick_ratio         | Quick Ratio (Acid Test)                                 |
| 61 | rd_sale             | Research and Development/Sales                          |
| 62 | rect_act            | Receivables/Current Assets                              |
| 63 | rect_turn           | Receivables Turnover                                    |
| 64 | roa                 | Return on Assets                                        |
| 65 | roce                | Return on Capital Employed                              |
| 66 | roe                 | Return on Equity                                        |
| 67 | sale_equity         | Sales/Stockholders Equity                               |
| 68 | sale_invcap         | Sales/Invested Capital                                  |
| 69 | sale_nwc            | Sales/Working Capital                                   |
| 70 | short_debt          | Short-Term Debt/Total Debt                              |
| 71 | staff_sale          | Labor Expenses/Sales                                    |

(Continued on next page)

Table S2 – *(Continued)*

| 72 | totdebt.invcap | Total Debt/Invested Capital |
|----|----------------|-----------------------------|
|----|----------------|-----------------------------|
